# Supplementary material for: Transcriptome integrated metabolic modeling of carbon assimilation underlying storage root development in cassava
Source: PubMed Central journal article supplement (PMC8062692; doi:10.1038/s41598-021-88129-3), 2021-04-22
Supplement: 41598_2021_88129_MOESM3_ESM.pdf [file 41598_2021_88129_MOESM3_ESM.pdf]

# Transcriptome integrated metabolic modeling of carbon assimilation underlying storage root development in cassava

Ratchaprapa Kamsen<sup>1</sup>, Saowalak Kalapanulak<sup>1,2</sup>, Porntip Chiewchankaset<sup>2</sup>, and Treenut Saithong<sup>1,2,\*</sup>

<sup>1</sup>Bioinformatics and Systems Biology Program, School of Bioresources and Technology and School of Information Technology, King Mongkut's University of Technology Thonburi (Bang Khun Thian), Bangkok, 10150, Thailand.

<sup>2</sup>Center for Agricultural Systems Biology, Systems Biology and Bioinformatics Research Group, Pilot Plant Development and Training Institute, King Mongkut's University of Technology Thonburi (Bang Khun Thian), Bangkok, 10150 Thailand

\*corresponding author; e-mail: [treenut.sai@kmutt.ac.th](mailto:treenut.sai@kmutt.ac.th)

**Supplementary Table S1** The detail of available transcriptome data of cassava storage roots

| No. | Datasets          | Cassava cultivars | Age of plants (DAP)* | Biological replicates | Mapping rate (%)** | No. of expressed genes                       |                                                                     | References                        |
|-----|-------------------|-------------------|----------------------|-----------------------|--------------------|----------------------------------------------|---------------------------------------------------------------------|-----------------------------------|
|     |                   |                   |                      |                       |                    | No. of expressed genes <sup>a</sup> (33,033) | No. of expressed metabolic genes in rMeCBM model <sup>a</sup> (762) |                                   |
| 1   | Wang2014_W14-75   | W14               | 75                   | -                     | 86%                | 26,944                                       | 737                                                                 | Wang <i>et al.</i> <sup>1</sup>   |
| 2   | Wang2014_KU50-75  | KU50              | 75                   | -                     | 93%                | 27,201                                       | 731                                                                 | Wang <i>et al.</i> <sup>1</sup>   |
| 3   | Wang2014_KU50-120 | KU50              | 120                  | -                     | 93%                | 26,851                                       | 734                                                                 | Wang <i>et al.</i> <sup>1</sup>   |
| 4   | Wang2014_KU50-150 | KU50              | 150                  | -                     | 93%                | 28,247                                       | 724                                                                 | Wang <i>et al.</i> <sup>1</sup>   |
| 5   | Wang2014_Arg7-75  | Arg7              | 75                   | -                     | 89%                | 28,014                                       | 731                                                                 | Wang <i>et al.</i> <sup>1</sup>   |
| 6   | Wang2014_Arg7-120 | Arg7              | 120                  | -                     | 92%                | 27,846                                       | 732                                                                 | Wang <i>et al.</i> <sup>1</sup>   |
| 7   | Wang2014_Arg7-150 | Arg7              | 150                  | -                     | 92%                | 27,583                                       | 745                                                                 | Wang <i>et al.</i> <sup>1</sup>   |
| 8   | Wilson2017_TME-90 | TME204            | 90                   | 2                     | 90%                | 23,188                                       | 731                                                                 | Wilson <i>et al.</i> <sup>2</sup> |

\* DAP is days after planting

\*\* Mapping rate is percentage of raw reads mapping to cassava AM560 genome (Bredeson *et al.*<sup>3</sup>)

<sup>a</sup> Expressed genes were defined based on (a) a number of mapped reads are more than 5 reads and (b) gene expression level is greater than zero FPKM. Number in parenthesis is total genes in cassava AM560 genome (33,033) and total genes in rMeCBM model (762 genes), respectively

**Supplementary Table S2** The characteristics of proteome data in developing cassava storage roots, including number of expressed proteins, and associated reactions

| No. | Datasets          | Characteristics   |                      |                               |                 | Proteins                                                     |                                                                |                                                                |                                                  | Reactions                                                             | References                               |
|-----|-------------------|-------------------|----------------------|-------------------------------|-----------------|--------------------------------------------------------------|----------------------------------------------------------------|----------------------------------------------------------------|--------------------------------------------------|-----------------------------------------------------------------------|------------------------------------------|
|     |                   | Cassava cultivars | Age of plants (MAP)* | Protein identification method | No. of datasets | No. of identified proteins <sup>a</sup> (unique protein IDs) | No. of annotated proteins in cassava genome V.4.1 <sup>a</sup> | No. of annotated proteins in cassava genome V.6.1 <sup>b</sup> | No. of annotated proteins in rMeCBM <sup>c</sup> | No. of reactions in rMeCBM related to annotated proteins <sup>d</sup> |                                          |
| 1   | Sheffield2006     | -                 | 3                    | QTOF-MS/MS                    | 1               | 42                                                           | -                                                              | 36                                                             | 8                                                | 29                                                                    | Sheffield <i>et al.</i> <sup>5</sup>     |
| 2   | Li2010            | SC8               | 3                    | LC-ESI-MS/MS                  | 1               | 155                                                          | -                                                              | 210                                                            | 48                                               | 83                                                                    | Li <i>et al.</i> <sup>6</sup>            |
| 3   | Owiti2011         | -                 | -                    | LC-MAIDI-MS                   | 1               | 949                                                          | -                                                              | 39                                                             | 5                                                | 7                                                                     | Owiti <i>et al.</i> <sup>7</sup>         |
| 4   | Vanderschuren2014 | TMS60444          | 10                   | TP3Q-MS/MS                    | 1               | -                                                            | 1194                                                           | 1031                                                           | 166                                              | 203                                                                   | Vanderschuren <i>et al.</i> <sup>8</sup> |
| 5   | Naconsie2015      | KU50              | 3                    | LC-MS/MS                      | 1               | 95                                                           | -                                                              | 61                                                             | 13                                               | 39                                                                    | Naconsie <i>et al.</i> <sup>9</sup>      |
|     |                   |                   |                      | Total (unique)                | 5               | -                                                            | -                                                              | 1180                                                           | 192                                              | 217                                                                   |                                          |

\*MAP is months after planting

<sup>a</sup> data was collected from literatures which belong to cassava storage roots at control condition.

<sup>b</sup> annotated proteins in cassava genome V.6.1 were identified if the identity percentage  $\geq 60$ , coverage percentage  $\geq 80$  and e-value  $\leq 10^{-10}$  using Blastp and proteins from all datasets as the query.

<sup>c</sup> the total number of proteins based on cassava genome V.6.1 in rMeCBM model is 852 proteins

<sup>d</sup> the protein-related reactions in rMeCBM model consist of 330 reactions

**Supplementary Table S3** The characteristics of metabolomic data in developing cassava storage roots including number of metabolites, and associated reactions

| No.            | Datasets             | Characteristics  |                     |                    |                               | Metabolites     |                                            | Reactions                                          | References |                                                                |
|----------------|----------------------|------------------|---------------------|--------------------|-------------------------------|-----------------|--------------------------------------------|----------------------------------------------------|------------|----------------------------------------------------------------|
|                |                      | No. of cultivars | Age of plant (MAP)* | Cultivation system | Protein identification method | No. of datasets | No. of identified metabolites <sup>a</sup> | No. of matching metabolites in rMeCBM <sup>b</sup> |            | No. of reactions in rMeCBM related to metabolites <sup>c</sup> |
| 1              | Drapal2020_Field     | 8 <sup>d</sup>   | 10                  | Field              | GC-MS                         | 8               | 93                                         | 25                                                 | 106        | Drapal <i>et al.</i> <sup>10</sup>                             |
| 2              | Obata2020_Field      | 6 <sup>e</sup>   | 4                   | Field              | GC-MS                         | 6               | 126                                        | 53                                                 | 217        | Obata <i>et al.</i> <sup>11</sup>                              |
| 3              | Obata2020_Greenhouse | 6 <sup>e</sup>   | 3                   | Greenhouse         | GC-MS                         | 6               | 126                                        | 53                                                 | 217        | Obata <i>et al.</i> <sup>11</sup>                              |
| Total (unique) |                      |                  |                     |                    |                               | 20              | 158                                        | 53                                                 | 217        |                                                                |

\* MAP is months after planting

<sup>a</sup> data was collected from literatures which belong to cassava storage roots at control condition.

<sup>b</sup> the total number of metabolites in rMeCBM model is 393 metabolites

<sup>c</sup> the protein-related reactions in rMeCBM model consist of 330 reactions

<sup>d</sup> Eight cassava cultivars: BRA1A, COL22, COL638, CUB23, PER183, PER283, PER483, and PER583

<sup>e</sup> Six cassava cultivars: IITA-TMS-IBA980581, IITA-TMS-IBA980002, IITA-TMS-IBA30572, IITA-TMS-IBA011412, TMEB693, and TMEB419

**Supplementary Table S4** Simulation of storage root growth rate through FBA and transcriptome-integrated metabolic models of cassava storage roots

| Algorithms                     | $S_{GAM}$<br>( $\text{mmol}_{ATP} \text{gDW}^{-1}_{SRs}$ ) | Storage root growth rate ( $\text{day}^{-1}$ ) |             | $\epsilon(\%)$ |
|--------------------------------|------------------------------------------------------------|------------------------------------------------|-------------|----------------|
|                                |                                                            | Prediction                                     | Experiment* |                |
| rMeCBM (FBA)                   | 9.8                                                        | 0.0090                                         | 0.0090      | 0              |
| rMeCBM <sub>x</sub> -GIMME-P25 | 9.8                                                        | 0.0090                                         | 0.0090      | 0              |
| rMeCBM <sub>x</sub> -GIMME-P50 | 9.8                                                        | 0.0090                                         | 0.0090      | 0              |
| rMeCBM <sub>x</sub> -GIMME-P75 | 9.8                                                        | 0.0090                                         | 0.0090      | 0              |
| rMeCBM <sub>x</sub> -GIMME-P90 | 9.8                                                        | 0.0090                                         | 0.0090      | 0              |
| rMeCBM <sub>x</sub> -EFlux     | 9.8                                                        | 0.0090                                         | 0.0090      | 0              |
| rMeCBM <sub>x</sub> -HPCOF     | 19.7                                                       | 0.0090                                         | 0.0090      | 0              |

$\epsilon$  was the percentage error of prediction to measured cassava storage root growth rate

\* Measured growth rate from experiment was obtained from Chiewchankaset *et al*<sup>4</sup>.

**Supplementary Table S5** The expression-guided active metabolic reactions in carbon assimilation pathway of cassava storage roots inferred by using different thresholds

| Models                         | Thresholds of gene expression in rMeCBM model | No. of expressed genes related in rMeCBM model | Total reactions (468 reactions)                    |                                       |                                   | Biochemical reactions with genes (330 reactions)   |                                       |                                   |                                                |
|--------------------------------|-----------------------------------------------|------------------------------------------------|----------------------------------------------------|---------------------------------------|-----------------------------------|----------------------------------------------------|---------------------------------------|-----------------------------------|------------------------------------------------|
|                                |                                               |                                                | No. of active reactions based on a given threshold | No. of reactions with non-zero fluxes | No. of reactions with zero fluxes | No. of active reactions based on a given threshold | No. of reactions with non-zero fluxes | No. of reactions with zero fluxes | No. of recovered low gene expression reactions |
| rMeCBM (FBA)                   | -                                             | 731                                            | 468                                                | 251                                   | 217                               | 330                                                | 163                                   | 167                               | -                                              |
| rMeCBM <sub>x</sub> -GIMME-P25 | 25 <sup>th</sup> percentile                   | 518                                            | 460                                                | 251                                   | 217                               | 325                                                | 161                                   | 169                               | 2                                              |
| rMeCBM <sub>x</sub> -GIMME-P50 | 50 <sup>th</sup> percentile                   | 345                                            | 421                                                | 254                                   | 214                               | 283                                                | 166                                   | 164                               | 22                                             |
| rMeCBM <sub>x</sub> -GIMME-P75 | 75 <sup>th</sup> percentile                   | 173                                            | 339                                                | 249                                   | 219                               | 201                                                | 158                                   | 172                               | 62                                             |
| rMeCBM <sub>x</sub> -GIMME-P90 | 90 <sup>th</sup> percentile                   | 70                                             | 253                                                | 249                                   | 219                               | 115                                                | 159                                   | 171                               | 112                                            |

**Supplementary Table S6** Identification of expressed genes in each representative scenario based on coefficient of variance (CV). It assumed that the representative gene set denoted the expressed genes in charge of regulation under the scenario was considered if the variation in terms of CV between the datasets in scenario was less than 25 percent. The representative gene set was also categorized based on expression level, in percentile basis of individual datasets

| Threshold of gene expression levels | Scenario 1<br>in developing storage roots of cassava<br>(all four cultivars) |                                         | Scenario 2<br>in developing storage roots of high-yield traits<br>(KU50 and ARG7) |                                         | Scenario 3<br>in developing storage roots of KU50 cultivar |                                         |
|-------------------------------------|------------------------------------------------------------------------------|-----------------------------------------|-----------------------------------------------------------------------------------|-----------------------------------------|------------------------------------------------------------|-----------------------------------------|
|                                     | No. of expressed genes (763 genes)                                           | No. of active reactions (330 reactions) | No. of expressed genes (763 genes)                                                | No. of active reactions (330 reactions) | No. of expressed genes (763 genes)                         | No. of active reactions (330 reactions) |
| > The 0 <sup>th</sup> percentile    | 472                                                                          | 330                                     | 545                                                                               | 330                                     | 589                                                        | 330                                     |
| > The 25 <sup>th</sup> percentile   | 464                                                                          | 282                                     | 524                                                                               | 290                                     | 552                                                        | 293                                     |
| > The 50 <sup>th</sup> percentile   | 354                                                                          | 268                                     | 369                                                                               | 270                                     | 379                                                        | 266                                     |
| > The 75 <sup>th</sup> percentile   | 180                                                                          | 212                                     | 188                                                                               | 216                                     | 191                                                        | 212                                     |

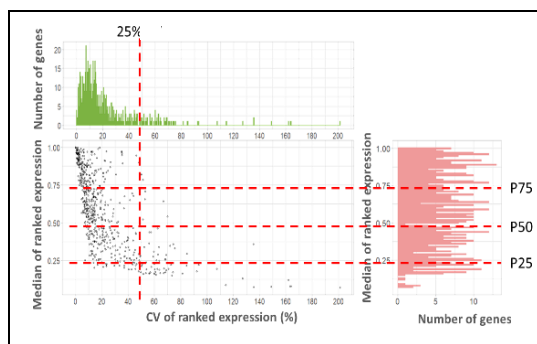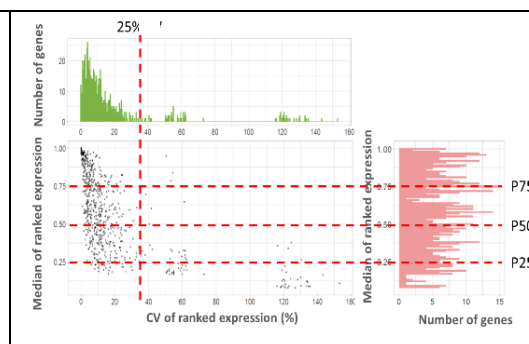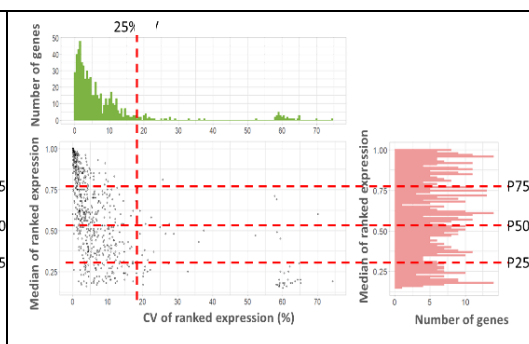

**Supplementary Table S7** GO analysis of the expressed gene set in each representative scenario

|                                   | Scenario 1<br>in developing storage roots of cassava<br>(all four cultivars) |                                 |                               |                     | Scenario 2<br>in developing storage roots of high-yield traits<br>(KU50 and ARG7) |                                 |                               |                     | Scenario 3<br>in developing storage roots of KU50 cultivar |                                 |                               |                     |
|-----------------------------------|------------------------------------------------------------------------------|---------------------------------|-------------------------------|---------------------|-----------------------------------------------------------------------------------|---------------------------------|-------------------------------|---------------------|------------------------------------------------------------|---------------------------------|-------------------------------|---------------------|
|                                   | No. of genes                                                                 | No. of genes with annotated GOs | % of genes with annotated GOs | No. of enriched GOs | No. of genes                                                                      | No. of genes with annotated GOs | % of genes with annotated GOs | No. of enriched GOs | No. of genes                                               | No. of genes with annotated GOs | % of genes with annotated GOs | No. of enriched GOs |
| > The 0 <sup>th</sup> percentile  | 472                                                                          | 367                             | 77.75                         | 177                 | 545                                                                               | 421                             | 77.25                         | 183                 | 589                                                        | 461                             | 78.27                         | 201                 |
| > The 25 <sup>th</sup> percentile | 464                                                                          | 363                             | 78.23                         | 176                 | 524                                                                               | 409                             | 78.05                         | 181                 | 552                                                        | 439                             | 79.53                         | 201                 |
| > The 50 <sup>th</sup> percentile | 354                                                                          | 282                             | 79.66                         | 160                 | 369                                                                               | 290                             | 78.59                         | 169                 | 379                                                        | 295                             | 77.84                         | 166                 |
| > The 75 <sup>th</sup> percentile | 180                                                                          | 145                             | 80.56                         | 115                 | 188                                                                               | 152                             | 80.85                         | 119                 | 191                                                        | 152                             | 79.58                         | 115                 |



## References

1. Wang, W. *et al.* Cassava genome from a wild ancestor to cultivated varieties. *Nat. Commun.* **5**, (2014).
2. Wilson, M. C. *et al.* Rapid report Gene expression atlas for the food security crop cassava. (2017) doi:10.1111/nph.14443.
3. Bredeson, J. V *et al.* resource Sequencing wild and cultivated cassava and related species reveals extensive interspecific hybridization and genetic diversity. **34**, (2016).
4. Chiewchankaset, P., Siriwat, W. & Suksangpanomrung, M. Understanding carbon utilization routes between high and low starch-producing cultivars of cassava through Flux Balance Analysis. *Sci. Rep.* 1–15 (2019) doi:10.1038/s41598-019-39920-w.
5. Sheffield, J., Taylor, N., Fauquet, C. & Chen, S. The cassava ( *Manihot esculenta* Crantz ) root proteome : 1588–1598 (2006) doi:10.1002/pmic.200500503.
6. Li, K. *et al.* Proteome characterization of cassava ( *Manihot esculenta* Crantz ) somatic embryos , plantlets and tuberous roots. 1–12 (2010).
7. Owiti, J. *et al.* iTRAQ-based analysis of changes in the cassava root proteome reveals pathways associated with post-harvest physiological deterioration. 145–156 (2011) doi:10.1111/j.1365-313X.2011.04582.x.
8. Vanderschuren, H. Large-Scale Proteomics of the Cassava Storage Root and Identification of a Target Gene to Reduce Postharvest Deterioration Large-Scale Proteomics of the Cassava Storage Root and Identification of a Target Gene to Reduce Postharvest Deterioration. (2014) doi:10.1105/tpc.114.123927.
9. Naconsie, M., Lertpanyasampatha, M. & Viboonjun, U. Cassava root membrane proteome reveals activities during storage root maturation. *J. Plant Res.* (2015) doi:10.1007/s10265-015-0761-4.
10. Drapal, M., Ovalle Rivera, T. M., Becerra Lopez-Lavalle, L. A. & Fraser, P. D. Exploring the chemotypes underlying important agronomic and consumer traits in cassava (*Manihot esculenta* crantz). *J. Plant Physiol.* **251**, 153206 (2020).
11. Obata, T. *et al.* Metabolic profiles of six African cultivars of cassava (*Manihot esculenta* Crantz) highlight bottlenecks of root yield. *Plant J.* 1202–1219 (2020) doi:10.1111/tpj.14693.
